# Supplementary material for: Erasable superconductivity in topological insulator Bi2Se3 induced by voltage pulse
Source: Research Square preprint supplement (doi:10.21203/rs.3.rs-97123/v1), 2020-11-03
Supplement: Supplementary file 1 [file 8421037c6c9421705a7d8067.pdf]

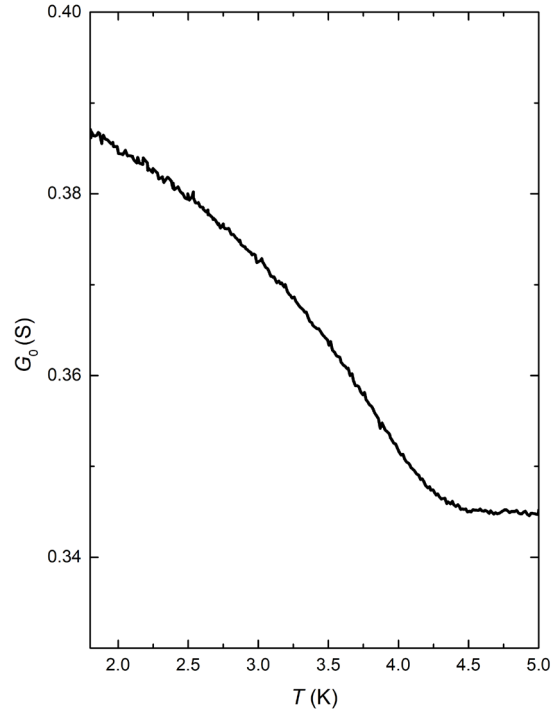

**Supplementary Figure S1** | Temperature dependence of zero bias conductance (ZBC) for the soft-PCS on  $\text{Bi}_2\text{Se}_3$ .

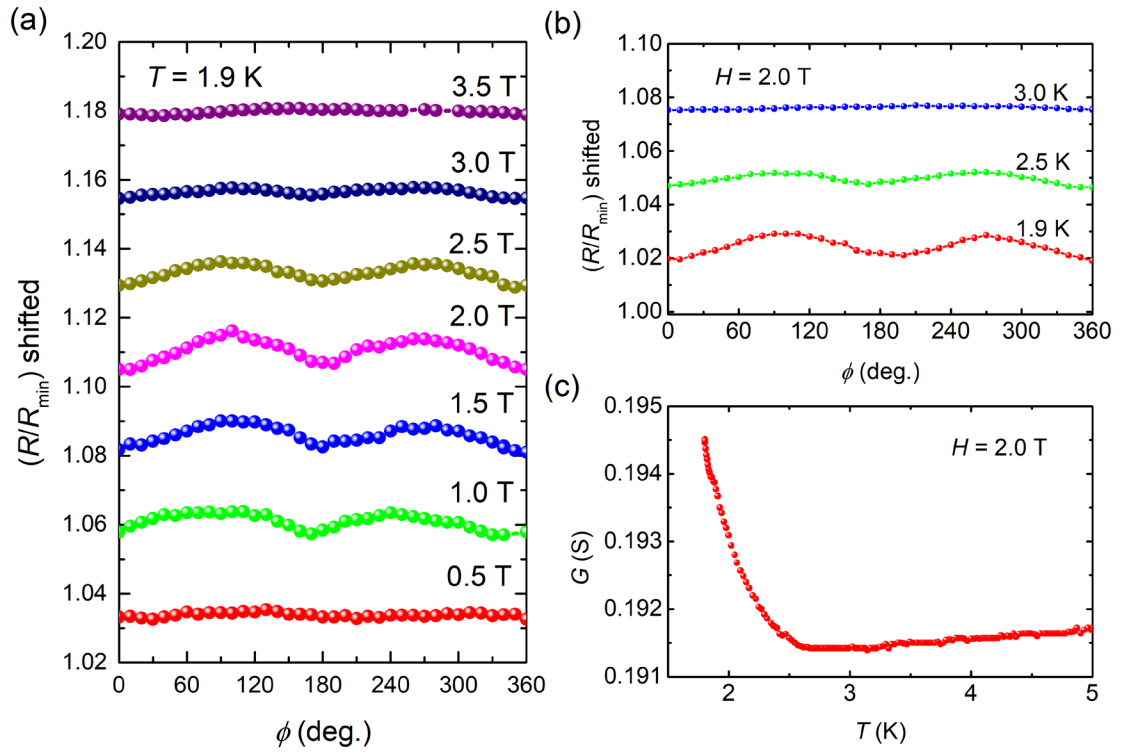

**Supplementary Figure S2** | (a) Angle dependence of ZBR for the soft-PCS at different magnetic fields within the ab-plane at 1.9 K; (b) Angle

dependence of ZBR for the soft-PCS at different temperatures within the ab-plane at 2.0 T; (c) Temperature dependence of ZBR for the soft-PCS on  $\text{Bi}_2\text{Se}_3$  at 2.0 T;
